# Supplementary material
Source: publisher figshare collection journal article supplement (https://gsapubs.figshare.com/articles/dataset/_/13952660)
Supplement: Supplementary file 1 [file 1]

Zhonghua Tian, Wenjiao Xiao, Brian F. Windley, Peng Huang, Ji'en Zhang, SongjianAo, Zhiyong Zhang, Dongfang Song, and Fulai Liu, 2021, Two key switches in regional stress field during multi-stage deformation in the Carboniferous–Triassic southernmost Altaids (Beishan, NW China): Response to orocline-related roll-back processes: GSA Bulletin, <https://doi.org/10.1130/B35898.1>.

## Supplemental Material

**Table S1.** (STS1) Samples collected near the study area.

**Table S2.** Sample information from the shear zone and mélange zone.

**Table S3.**

(1) U-Pb isotope dates of magmatic zircons in granitic mylonites (11HYJ02 and 11QJJ01) from the Huoshishan ophiolitic mélange and the Qijiaojing shear zone. See Figure 2 for sample locations.

(2)  $^{40}\text{Ar}/^{39}\text{Ar}$  step-heating results of muscovites and biotite in granitic mylonites (11QJJ01, 11HYJ02, 11HYJ01-2, 11HYJ04 and 10TZHD03) from the Hongyangjing shear zone, the Huoshishan ophiolitic mélange, and the Qijiaojing shear zone. See Figure 2 for sample locations.

(3) Methods: Methods divide into analytical method-EBSD (Electron backscatter diffraction), analytical method-U-Pb age dating, analytical method- $^{39}\text{Ar}$ - $^{40}\text{Ar}$  age dating.

**Table S4.** the raw data of  $^{40}\text{Ar}/^{39}\text{Ar}$  from Institute of Geology and Geophysics, Chinese Academy of Science (IGGCAS) are given in the Supplementary data Table S4.

Data in Table S3 from this manuscript are available in Mendeley Data repository (<http://dx.doi.org/10.17632/vj42p992pv.3>).

Table S1. (STS1) Samples collected near the study area

| No. Red star | Location                      | Rock-type              | Location or GPS position  | Method                                     | Age (Ma)                              | Age description      | Data from          |
|--------------|-------------------------------|------------------------|---------------------------|--------------------------------------------|---------------------------------------|----------------------|--------------------|
| 1            | The Pochengshan area          | Granodiorite           | 41°58'54" N, 95°07' 15" E | Zircon LA-ICP-MS                           | 308 ±4                                | Formation age        | Tian et al., 2017  |
| 2            | The Pochengshan area          | Rhyolite               | 41°55'57" N, 96°01' 06" E | Zircon LA-ICP-MS                           | 319 ±3                                | Eruption age         | Tian et al., 2017  |
| 3            | The Hongyanjing basin         | Siltstone              | 41°48'10" N, 95°58' 48" E | Fossil                                     | C <sub>3</sub> to P                   | Depositional age     | This study         |
| 4            | The Hongyanjing basin         | Sandstone              | 41°48'10" N, 95°58' 48" E | Zircon LA-ICP-MS                           | Min-peak 273                          | Max Depositional age | Tian et al., 2013  |
| 5            | The Hongyanjing basin         | Diabase                | 41°47'24" N, 96°06' 01" E | Zircon LA-ICP-MS                           | 219 Ma                                | Intrusive age        | Tian et al., 2013  |
| 6            | The Hongyanjing shear zone    | Mylonite               | 41°44'56" N, 96°04' 02" E | Ms <sup>40</sup> Ar- <sup>39</sup> Ar      | 325.9±2.5                             | Deformation age      | This study         |
| 7            | The Hongyanjing shear zone    | Mylonite               | 41°44'58" N, 96°09' 31" E | Ms <sup>40</sup> Ar- <sup>39</sup> Ar      | 335.8±1.6                             | Deformation age      | This study         |
| 8            | The North Lebaquan fault      | Mylonite               | 41°44'41" N, 96°32' 04" E | Ms <sup>40</sup> Ar- <sup>39</sup> Ar      | 323.1±3.6                             | Deformation age      | Song et al., 2018  |
| 9            | The Lebaquan fault            | Mylonite               | 41°44'38" N, 96°29' 46" E | Ms <sup>40</sup> Ar- <sup>39</sup> Ar      | 296.0±3.7                             | Deformation age      | Song et al., 2018  |
| 10           | The Hongyanjing shear zone    | Mylonite               | 41°43'45" N, 96°25' 49" E | Ms <sup>40</sup> Ar- <sup>39</sup> Ar      | 262.2±3.1                             | Deformation age      | Song et al., 2018  |
| 11           | The Caohulehade fault         | Mylonite               | 41°42'48" N, 96°26' 56" E | Ms <sup>40</sup> Ar- <sup>39</sup> Ar      | 209.2±4.0                             | Deformation age      | Song et al., 2018  |
| 12           | Accretionary wedge            | Mylonite               | 41°44'42" N, 96°05' 56" E | Ms <sup>40</sup> Ar- <sup>39</sup> Ar      | 289.2±3.1                             | Deformation age      | This study         |
| 13           | Accretionary wedge            | Mylonite               | 41°44'34" N, 96°04' 46" E | Ms <sup>40</sup> Ar- <sup>39</sup> Ar      | 303.1±1.5                             | Deformation age      | This study         |
|              |                               |                        |                           | Zircon LA-ICP-MS                           | 400.3±9.8                             | Formation age        | This study         |
| 14           | The Xingxingxia shear zone    | Mylonite               | N41°47'18", E95°07'53"    | Ms <sup>40</sup> Ar- <sup>39</sup> Ar      | 237.8 ± 1.2                           | Deformation age      | Wang et al., 2010  |
| 15           | The Niujuanzi ophiolite       | Gabbro                 | 41°34'10" N, 96°34' 16" E | Zircon LA-ICP-MS                           | 435.0 ± 1.9                           | Formation age        | Tian et al., 2014  |
|              |                               | Gabbro                 | Very close                | Zircon LA-ICP-MS                           | 354.0 ± 3.3                           | Formation age        | Wang et al., 2018  |
| 16           | The Huoshishan ophiolite      | Gabbro                 | 41°35'24" N, 96°04' 30" E | Zircon LA-ICP-MS                           | 410.5 ± 3.7                           | Formation age        | Tian et al., 2014  |
| 17           | The Qijiaoing shear zone      | Mylonite               | 41°25'25" N, 96°00'12" E  | Biotite <sup>40</sup> Ar- <sup>39</sup> Ar | 328.8±3.7                             | Deformation age      | This study         |
|              |                               |                        |                           | Zircon LA-ICP-MS                           | 399.8 ±10                             | Formation age        | This study         |
| 18           | The NE Huoshishan area        | Granite                | 41°38'05" N, 96°15'19" E  | Zircon LA-ICP-MS                           | 408.5 ±3.1                            | Formation age        | Wang et al.,2018   |
| 19           | The Mingshui area             | Monzogranite           | 42°01'N, 96°22'E          | Zircon LA-ICP-MS                           | 328.0 ± 2                             | Formation age        | Zhang et al.,2017  |
| 20           | The Hongyanjing basin         | Sandstone              | 41°52'38" N, 96°04' 09" E | Zircon LA-ICP-MS                           | Min-peak 249                          | Max Depositional age | Tian et al., 2013  |
| 21           | The Huaniushan-Dundunshan arc | Andesite               | 41°20'00" N, 96°23' 30" E | Zircon LA-ICP-MS                           | 370.9 ± 1.3                           | Formation age        | Guo et al., 2014   |
| 22           | The Shuangyingshan area       | Gneiss                 | 41°29'07" N, 96°30' 57" E | Zircon LA-ICP-MS                           | Min-peak 374                          | Max Depositional age | Song et al., 2013a |
| 23           | The Hongyanjing basin         | Sandstone              | 41°48'40" N, 96°07' 01" E | Apatite Fission Track                      | 225Ma                                 | First folding        | Tian et al., 2016  |
| 24           | Accretionary wedge            | mylonitic granite      | 3 km north of 25          | Zircon LA-ICP-MS                           | 409 ± 5.2                             | Formation age        | Song et al., 2013b |
| 25           | Accretionary wedge            | Schist-11CH02          | 41°41'48" N, 96°24' 42" E | Zircon LA-ICP-MS                           | Min-peak 450                          | Max Depositional age | Song et al., 2013b |
| 26           | Accretionary wedge            | Granitic gneiss        | 41°41'48" N, 96°24' 42" E | Zircon LA-ICP-MS                           | 525 ± 6.1                             | Formation age        | Song et al., 2013b |
| 27           | The Heishan area              | Gabbro dike            | 42°20'N, 96°00'E          | Zircon LA-ICP-MS                           | 357± 4                                | Intrusive age        | Xie et al., 2012   |
| 28           | The Bogda arc                 | Bimodal volcanic rocks |                           | Zircon LA-ICP-MS                           | 347.1 ± 3.9 (basic)<br>345Ma (felsic) | Eruption age         | Chen et al., 2013  |

Locations of the samples in this table are shown in Figure 2; points 14 and 28 is shown in Figure 1. Min: short for minimum; Ms: short for muscovite

Table S2. Sample information from the shear zone and mélange zone.

| Sample    | Rock-type            | Sample location                                                   | Lab analysis by                                    | Data presented         |
|-----------|----------------------|-------------------------------------------------------------------|----------------------------------------------------|------------------------|
| 11HYJ04   | Granitic<br>mylonite | West of the Hongyanjing<br>shear zone, see Figures. 2<br>and 15a  | <i>Thin section</i>                                | Figure 10a             |
|           |                      |                                                                   | <i>EBSD</i>                                        | Figure 11a             |
|           |                      |                                                                   | <i><sup>39</sup>Ar-<sup>40</sup>Ar (Muscovite)</i> | Table S2, Figure 13a   |
| 10TZHD03  | Mylonite             | East of the Hongyanjing<br>shear zone, see Figures.<br>2 and 15a  | <i>Thin section</i>                                | Figure 10b             |
|           |                      |                                                                   | <i><sup>39</sup>Ar-<sup>40</sup>Ar (Muscovite)</i> | Table S2, Figure 13b   |
| 11HYJ01-2 | Granitic<br>mylonite | South of the Hongyanjing<br>shear zone, see Figures. 2<br>and 15a | <i>Thin section</i>                                | Figure 10e             |
|           |                      |                                                                   | <i>EBSD</i>                                        | Figure 11c             |
|           |                      |                                                                   | <i><sup>39</sup>Ar-<sup>40</sup>Ar (Muscovite)</i> | Table S2, Figure 13e   |
| 11HYJ02   | Granitic<br>mylonite | South of the Hongyanjing<br>shear zone, see Figures. 2<br>and 15a | <i>Thin section</i>                                | Figure 10f             |
|           |                      |                                                                   | <i>EBSD</i>                                        | Figure 11d             |
|           |                      |                                                                   | <i><sup>39</sup>Ar-<sup>40</sup>Ar (Muscovite)</i> | Table S2, Figure 13d   |
|           |                      |                                                                   | <i>Zircon U-Pb</i>                                 | Table S1, Figure 12d   |
| 11QJJ01   | Granitic<br>mylonite | In the Qijiaojing shear<br>zone, see Figures. 2 and 3c            | <i>Thin section</i>                                | Figure 10c-d           |
|           |                      |                                                                   | <i>EBSD</i>                                        | Figure 11b             |
|           |                      |                                                                   | <i><sup>39</sup>Ar-<sup>40</sup>Ar (Biotite)</i>   | Table S2, Figure 13c   |
|           |                      |                                                                   | <i>Zircon U-Pb</i>                                 | Table S1, Figure 12b-c |

For methods of EBSD, U-Pb and Ar-Ar dating, please see in Supplementary data TS3.

## Methods

### Analytical method-EBSD (Electron backscatter diffraction)

Four samples from the Hongyanjing shear zone and the DundunshanHuaniushan arc were analyzed using EBSD at the Micro-laboratory of Continental Dynamics, China Geological Survey. XZ sections (parallel to lineation and normal to foliation) were cut from the samples and polished using Buehler Mastermet colloidal silica and a Buehler grinder-polisher. The LPO data acquisition was finished on a FEI Quanta450 scanning electron microscope mounted with an Oxford Nordlys F+ EBSD detector; the thin section surface was inclined 70° to the incidental beam. This new technique provides fast data acquisition for mineral grains or a portion thereof with 0.1  $\mu\text{m}$  spatial resolution and 0.5° angular resolution. A 20 kV acceleration voltage was applied and the working distance was 18.0-20.0 mm. EBSD analysis was completed using the HKL Channel 5 software package. LPO measurements were performed on quartz grains using the interactive mode because the mineral grain sizes in the rocks were large. Several representative windows (8-9) 500-300  $\mu\text{m}$  in size were used for LPO data acquisition. Most of these windows contained representative quartz grains. Data from all of the windows were merged to form the sample data set. The interactive mode is a reliable method to collect EBSD data from representative grains or subgrains in the field of view. All of the LPO data are presented with an equal area, lower hemisphere projection in a structural frame of a foliation parallel to the XY plane and lineation parallel to the X direction.

### Analytical method-U-Pb age dating

Two igneous rocks, 11HYJ02 and 11QJJ01 (Figures 3c and 3e), from the granitic mylonite in the accretionary wedge and the Qijiaoqing shear zone, respectively, were selected for zircon U-Pb dating. After sample crushing, >100 zircon grains were sorted by standard heavy liquid and magnetic techniques. Representative zircons were selected and mounted on adhesive tape, then enclosed in epoxy resin and polished. CL images were made using a SX51 Electron Probe Micro-analyzer for high-resolution imaging and spectroscopy at the IGGCAS. The acceleration voltage during the CL imaging was 15 kV.

For all the samples, isotopic measurements were made using an Agilent 7500a quadrupole (Q)-ICPMS at the LA-MC-ICPMS laboratory of IGGCAS in Beijing.  $^{207}\text{Pb}/^{206}\text{Pb}$  and  $^{206}\text{Pb}/^{238}\text{U}$  ratios were calculated using GLITTER 4.0 (Griffin et al., 2008). Standards were one zircon 91500 and one GJ-1. The relative standard deviations of reference values for 91500 were set at 2%. Detailed analytical procedures and experimental parameters are listed in Xie et al. (2008). The age data are shown in supporting information, Table S1.

### Analytical method- $^{39}\text{Ar}$ - $^{40}\text{Ar}$ age dating

All aliquots of samples (see Table 2) were wrapped in aluminum foil to form wafers and stacked in quartz vials with the international standard YBCs ( $29.286 \pm 0.045$  Ma (Wang et al., 2014)). Neutron irradiation was carried out in position H8 of the 49-2 Nuclear Reactor (49-2 NR), Beijing (China), with a flux of  $\sim 6.5 \times 10^{12}$  n ( $\text{cm}^2\text{s}$ ) $^{-1}$  for 24 hours. A CO<sub>2</sub> laser fusion technique was used for the  $^{40}\text{Ar}/^{39}\text{Ar}$  analyses.

Isotopic measurements were made on a Noblesse mass spectrometer at the Institute of Geology and Geophysics, Chinese Academy of Science (IGGCAS) in Beijing. Ca and K correction factors are  $[^{36}\text{Ar}/^{37}\text{Ar}]\text{Ca} = 0.000261 \pm 0.0000142$ ,  $[^{39}\text{Ar}/^{37}\text{Ar}]\text{Ca} = 0.000724 \pm 0.0000281$ ,  $[^{40}\text{Ar}/^{39}\text{Ar}]\text{K} = 0.00088 \pm 0.000023$ . Ages were calculated using the decay constant ( $5.543 \times 10^{-10} \text{yr}^{-1}$ ) listed by Steiger & Jäger (1977), and all errors were quoted at the 2 $\sigma$  level.

Plateau ages were determined from three or more contiguous steps, comprising >50% of the  $^{39}\text{Ar}$  released, revealing concordant ages at a 95% confidence level. Because no assumption was made regarding the trapped component, the preferred age is an isochron age, calculated from the results of plateau steps using the York regression algorithm (York, 1968).

The errors in age reported here are internal errors, including analytical errors, and errors of blank, interaction factor, mass-discrimination, and J-value; the error on the total decay constant is not propagated into the age error. Uncertainties on all data reported herein are at a 95% confidence level ( $2\sigma$ ). The data were processed using ArArCALC(Koppers, 2002). The age data are shown in supporting information Table S2.

## Data

U-Pb isotope dates of magmatic zircons in granitic mylonites (11HYJ02 and 11QJJ01) from the Huoshishan ophiolitic mélange and the Qijiaoing shear zone. See Figure 2 for sample locations.

| No              | Isotopic ratios                   |           |                                  |           |                                  |           | Age(Ma)                           |           |                                  |           |                                  |           |
|-----------------|-----------------------------------|-----------|----------------------------------|-----------|----------------------------------|-----------|-----------------------------------|-----------|----------------------------------|-----------|----------------------------------|-----------|
|                 | $^{207}\text{Pb}/^{206}\text{Pb}$ | $1\sigma$ | $^{207}\text{Pb}/^{235}\text{U}$ | $1\sigma$ | $^{206}\text{Pb}/^{238}\text{U}$ | $1\sigma$ | $^{207}\text{Pb}/^{206}\text{Pb}$ | $1\sigma$ | $^{207}\text{Pb}/^{235}\text{U}$ | $1\sigma$ | $^{206}\text{Pb}/^{238}\text{U}$ | $1\sigma$ |
| <b>11HYJ02</b>  |                                   |           |                                  |           |                                  |           |                                   |           |                                  |           |                                  |           |
| 1               | 0.0621                            | 0.0069    | 0.5389                           | 0.0541    | 0.0630                           | 0.0033    | 677                               | 127       | 438                              | 36        | <b>394</b>                       | 20        |
| 2               | 0.0563                            | 0.0010    | 0.5304                           | 0.0083    | 0.0683                           | 0.0009    | 466                               | 16        | 432                              | 6         | <b>426</b>                       | 5         |
| 3               | 0.0577                            | 0.0018    | 0.5282                           | 0.0148    | 0.0664                           | 0.0011    | 518                               |           | 431                              | 10        | <b>414</b>                       | 7         |
| 4               | 0.0602                            | 0.0013    | 0.5171                           | 0.0092    | 0.0623                           | 0.0008    | 609                               | 48        | 423                              | 6         | <b>390</b>                       | 5         |
| 5               | 0.0570                            | 0.0009    | 0.5163                           | 0.0055    | 0.0657                           | 0.0007    | 493                               | 34        | 423                              | 4         | <b>410</b>                       | 4         |
| 6               | 0.0610                            | 0.0012    | 0.5110                           | 0.0077    | 0.0608                           | 0.0007    | 638                               | 42        | 419                              | 5         | <b>380</b>                       | 4         |
| 7               | 0.0563                            | 0.0014    | 0.5069                           | 0.0104    | 0.0654                           | 0.0009    | 463                               | 55        | 416                              | 7         | <b>408</b>                       | 5         |
| 8               | 0.0552                            | 0.0016    | 0.5063                           | 0.0127    | 0.0666                           | 0.0010    | 420                               | 67        | 416                              | 9         | <b>415</b>                       | 6         |
| 9               | 0.0604                            | 0.0022    | 0.5049                           | 0.0162    | 0.0606                           | 0.0010    | 618                               | 81        | 415                              | 11        | <b>379</b>                       | 6         |
| 10              | 0.0560                            | 0.0019    | 0.5038                           | 0.0159    | 0.0652                           | 0.0012    | 454                               | 39        | 414                              | 11        | <b>407</b>                       | 7         |
| 11              | 0.0563                            | 0.0012    | 0.5024                           | 0.0090    | 0.0648                           | 0.0008    |                                   | 50        | 413                              | 6         | <b>404</b>                       | 5         |
| 12              | 0.0579                            | 0.0016    | 0.4920                           | 0.0114    | 0.0616                           | 0.0009    | 526                               | 62        | 406                              | 8         | <b>386</b>                       | 5         |
| 13              | 0.0563                            | 0.0032    | 0.4890                           | 0.0253    | 0.0630                           | 0.0016    | 463                               | 131       | 404                              | 17        | <b>394</b>                       | 9         |
| 14              | 0.0568                            | 0.0043    | 0.4841                           | 0.0327    | 0.0618                           | 0.0020    | 484                               | 170       | 401                              | 22        | <b>387</b>                       | 12        |
| 15              | 0.0555                            | 0.0027    | 0.4818                           | 0.0205    | 0.0630                           | 0.0014    | 431                               | 110       | 399                              | 14        | <b>394</b>                       | 8         |
| <b>11QJJ 01</b> |                                   |           |                                  |           |                                  |           |                                   |           |                                  |           |                                  |           |
| 1               | 0.1234                            | 0.0028    | 1.1580                           | 0.0221    | 0.0681                           | 0.0008    | 2005                              | 41        | 781                              | 10        | <b>425</b>                       | 5         |
| 2               | 0.1144                            | 0.0031    | 1.0691                           | 0.0244    | 0.0678                           | 0.0009    | 1870                              | 49        | 738                              | 12        | <b>423</b>                       | 6         |
| 3               | 0.3670                            | 0.0073    | 3.4154                           | 0.0518    | 0.0675                           | 0.0009    | 3779                              | 31        | 1508                             | 12        | <b>421</b>                       | 5         |
| 4               | 0.4516                            | 0.0094    | 4.1470                           | 0.0665    | 0.0666                           | 0.0009    | 4091                              | 32        | 1664                             | 13        | <b>416</b>                       | 5         |
| 5               | 0.1398                            | 0.0028    | 1.2754                           | 0.0210    | 0.0662                           | 0.0008    | 2224                              | 36        | 835                              | 9         | <b>413</b>                       | 5         |
| 6               | 0.1163                            | 0.0029    | 1.0543                           | 0.0224    | 0.0657                           | 0.0009    | 1901                              | 46        | 731                              | 11        | <b>410</b>                       | 5         |
| 7               | 0.1156                            | 0.0020    | 1.0417                           | 0.0143    | 0.0654                           | 0.0007    | 1889                              | 32        | 725                              | 7         | <b>408</b>                       | 4         |
| 8               | 0.0715                            | 0.0024    | 0.6266                           | 0.0191    | 0.0636                           | 0.0009    | 972                               | 70        | 494                              | 12        | <b>397</b>                       | 5         |
| 9               | 0.0562                            | 0.0009    | 0.4912                           | 0.0066    | 0.0635                           | 0.0007    | 458                               | 38        | 406                              | 4         | <b>397</b>                       | 4         |
| 10              | 0.0543                            | 0.0008    | 0.4718                           | 0.0067    | 0.0631                           | 0.0007    | 384                               | 15        | 392                              | 5         | <b>395</b>                       | 4         |
| 11              | 0.0734                            | 0.0011    | 0.6332                           | 0.0070    | 0.0626                           | 0.0006    | 1024                              | 31        | 498                              | 4         | <b>391</b>                       | 4         |
| 12              | 0.0560                            | 0.0015    | 0.4780                           | 0.0113    | 0.0619                           | 0.0007    | 454                               | 60        | 397                              | 8         | <b>387</b>                       | 4         |
| 13              | 0.0550                            | 0.0012    | 0.4532                           | 0.0089    | 0.0598                           | 0.0007    | 412                               | 51        | 380                              | 6         | <b>374</b>                       | 4         |

$^{40}\text{Ar}/^{39}\text{Ar}$  step-heating results of muscovites and biotite in granitic mylonites (11QJJ01, 11HYJ02, 11HYJ01-2, 11HYJ04 and 10TZHD03) from the Hongyangjing shear zone, the Huoshishan ophiolitic mélange, and the Qijiaoing shear zone. See Figure 2 for sample locations.

| Temp.<br>(°C)                                               | $^{40}\text{Ar}/^{39}\text{Ar}$ | $^{37}\text{Ar}/^{39}\text{Ar}$ | $^{36}\text{Ar}/^{39}\text{Ar}$ | $^{40}\text{Ar}^*/^{39}\text{Ark}$ | $^{40}\text{Ar}^*$<br>(%) | $^{39}\text{Ark}$<br>(%) | Age    | $\pm\sigma$ |
|-------------------------------------------------------------|---------------------------------|---------------------------------|---------------------------------|------------------------------------|---------------------------|--------------------------|--------|-------------|
| <b>Sample no. 11QJJ01 Biotite J = 0.0031800 ± 0.0000080</b> |                                 |                                 |                                 |                                    |                           |                          |        |             |
| 750 °C                                                      | 63.34165                        | 0.10704                         | 0.00444                         | 62.044541                          | 97.94                     | 4.77                     | 325.62 | ± 3.52      |
| 800 °C                                                      | @ 64.50171                      | 0.02666                         | 0.00276                         | 63.690535                          | 98.74                     | 14.32                    | 333.51 | ± 1.51      |
| 840 °C                                                      | @ 64.30323                      | 0.05160                         | 0.00315                         | 63.380363                          | 98.56                     | 11.23                    | 332.03 | ± 1.45      |
| 880 °C                                                      | @ 63.32661                      | 0.05223                         | 0.00342                         | 62.323947                          | 98.41                     | 9.90                     | 326.97 | ± 1.39      |
| 920 °C                                                      | @ 62.62068                      | 0.06690                         | 0.00408                         | 61.424592                          | 98.08                     | 10.09                    | 322.64 | ± 1.60      |
| 960 °C                                                      | @ 62.74092                      | 0.06916                         | 0.00313                         | 61.824636                          | 98.53                     | 13.71                    | 324.57 | ± 1.43      |
| 990 °C                                                      | @ 63.22220                      | 0.06316                         | 0.00234                         | 62.540190                          | 98.92                     | 10.86                    | 328.00 | ± 1.54      |
| 1030 °C                                                     | @ 64.53283                      | 0.03798                         | 0.00194                         | 63.964171                          | 99.12                     | 11.94                    | 334.82 | ± 1.70      |
| 1070 °C                                                     |                                 | 0.06492                         | 0.00208                         | 65.390619                          | 99.08                     | 8.04                     | 341.62 | ± 1.74      |
| 1110 °C                                                     |                                 | 0.27128                         | 0.00417                         | 64.878800                          | 98.17                     | 2.42                     | 339.19 | ± 3.48      |
| 1210 °C                                                     |                                 | 0.30836                         | 0.00544                         | 61.211410                          | 97.48                     | 2.18                     | 321.62 | ± 1.74      |

|                                                                 |   |           |         |         |            |       |       |        |         |
|-----------------------------------------------------------------|---|-----------|---------|---------|------------|-------|-------|--------|---------|
| 1300 °C                                                         |   | 65.41255  | 0.89208 | 0.01071 | 62.367177  | 95.27 | 0.53  | 327.17 | ±11.47  |
| <b>Sample no. 11HYJ02 Muscovite J = 0.0033800 ± 0.0000085</b>   |   |           |         |         |            |       |       |        |         |
| 750 °C                                                          |   | 51.00986  | 0.03976 | 0.00905 | 48.341008  | 94.76 | 0.75  | 273.67 | ± 2.62  |
| 800 °C                                                          |   | 50.31896  | 0.01206 | 0.00651 | 48.396734  | 96.18 | 3.78  | 273.96 | ± 1.76  |
| 840 °C                                                          |   | 50.71341  | 0.00590 | 0.00630 | 48.851902  | 96.33 | 4.77  | 276.35 | ± 1.36  |
| 880 °C                                                          |   | 53.68346  | 0.00509 | 0.00625 | 51.836379  | 96.56 | 10.83 | 291.94 | ± 1.33  |
| 910 °C                                                          |   | 53.92413  | 0.00160 | 0.00346 | 52.900288  | 98.10 | 16.38 | 297.47 | ± 1.21  |
| 940 °C                                                          |   | 54.53826  | 0.00370 | 0.00374 | 53.432947  | 97.97 | 12.91 | 300.23 | ± 1.37  |
| 970 °C                                                          | @ | 55.06301  | 0.00622 | 0.00415 | 53.838564  | 97.78 | 10.51 | 302.33 | ± 1.30  |
| 1000 °C                                                         | @ | 55.33060  | 0.00850 | 0.00420 | 54.089816  | 97.76 | 7.94  | 303.62 | ± 1.34  |
| 1030 °C                                                         | @ | 55.11449  | 0.00095 | 0.00378 | 53.997328  | 97.97 | 7.11  | 303.15 | ± 1.33  |
| 1060 °C                                                         | @ | 54.66950  | 0.02625 | 0.00317 | 53.734509  | 98.29 | 6.96  | 301.79 | ± 1.41  |
| 1090 °C                                                         | @ | 54.55836  | 0.00958 | 0.00176 | 54.037921  | 99.05 | 9.66  | 303.36 | ± 1.26  |
| 1120 °C                                                         | @ | 54.52135  | 0.01115 | 0.00121 | 54.165889  | 99.35 | 6.54  | 304.02 | ± 1.38  |
| 1150 °C                                                         |   | 54.24162  | 0.04626 | 0.00254 | 53.496077  | 98.62 | 0.86  | 300.55 | ± 4.48  |
| 1250 °C                                                         |   | 52.71337  | 0.11482 | 0.00381 | 51.600274  | 97.88 | 0.77  | 290.71 | ± 3.30  |
| 1300 °C                                                         |   | 55.10624  | 0.20406 | 0.00746 | 52.928258  | 96.03 | 0.23  | 297.61 | ± 4.41  |
| <b>Sample no. 11HYJ01-2 Muscovite J = 0.0033700 ± 0.0000084</b> |   |           |         |         |            |       |       |        |         |
| 750 °C                                                          |   | 44.70974  | 0.22015 | 0.00851 | 42.219517  | 94.41 | 0.70  | 240.55 | ± 4.50  |
| 800 °C                                                          |   | 44.81229  | 0.06068 | 0.00593 | 43.067055  | 96.10 | 3.03  | 245.07 | ± 1.37  |
| 840 °C                                                          |   | 46.06426  | 0.04533 | 0.00610 | 44.265857  | 96.09 | 3.89  | 251.44 | ± 1.36  |
| 880 °C                                                          |   | 50.13194  | 0.01967 | 0.00445 | 48.820156  | 97.38 | 10.52 | 275.43 | ± 1.19  |
| 910 °C                                                          | @ | 51.93569  | 0.01522 | 0.00292 | 51.075157  | 98.34 | 14.65 | 287.19 | ± 1.27  |
| 940 °C                                                          | @ | 52.89142  | 0.01492 | 0.00256 | 52.137679  | 98.57 | 14.05 | 292.71 | ± 1.24  |
| 970 °C                                                          | @ | 52.97400  | 0.01558 | 0.00235 | 52.279972  | 98.69 | 12.13 | 293.44 | ± 1.18  |
| 1000 °C                                                         | @ | 52.07881  | 0.02559 | 0.00247 | 51.350337  | 98.60 | 8.00  | 288.62 | ± 1.29  |
| 1050 °C                                                         | @ | 51.63295  | 0.02090 | 0.00219 | 50.987276  | 98.75 | 10.04 | 286.73 | ± 1.20  |
| 1080 °C                                                         | @ | 51.20384  | 0.03241 | 0.00165 | 50.719267  | 99.05 | 7.24  | 285.34 | ± 1.37  |
| 1130 °C                                                         |   | 49.65409  | 0.03281 | 0.00168 | 49.160288  | 99.00 | 6.08  | 277.21 | ± 1.51  |
| 1180 °C                                                         |   | 43.87590  | 0.05447 | 0.00283 | 43.046782  | 98.11 | 3.47  | 244.96 | ± 1.56  |
| 1230 °C                                                         |   | 41.16183  | 0.05315 | 0.00261 | 40.397608  | 98.14 | 3.99  | 230.81 | ± 1.35  |
| 1280 °C                                                         |   | 41.71180  | 0.08280 | 0.00299 | 40.837849  | 97.90 | 1.95  | 233.17 | ± 3.79  |
| 1400 °C                                                         |   | 49.05318  | 0.57901 | 0.01686 | 44.138770  | 89.94 | 0.28  | 250.76 | ±14.93  |
| <b>Sample no. 11HYJ04 Muscovite J = 0.0033900 ± 0.0000085</b>   |   |           |         |         |            |       |       |        |         |
| 750 °C                                                          |   | 53.10696  | 0.00224 | 0.01561 | 48.492548  | 91.31 | 0.82  | 275.22 | ± 6.14  |
| 800 °C                                                          |   | 52.83159  | 0.00801 | 0.00650 | 50.912802  | 96.37 | 3.96  | 287.92 | ± 1.42  |
| 840 °C                                                          |   | 55.61881  | 0.00345 | 0.00607 | 53.825879  | 96.78 | 6.51  | 303.08 | ± 1.51  |
| 880 °C                                                          |   | 57.76964  | 0.00088 | 0.00383 | 56.636741  | 98.04 | 21.67 | 317.60 | ± 1.35  |
| 910 °C                                                          |   | 57.41995  | 0.00030 | 0.00342 | 56.409870  | 98.24 | 14.72 | 316.43 | ± 1.31  |
| 940 °C                                                          | @ | 58.86036  | 0.00186 | 0.00412 | 57.643373  | 97.93 | 10.36 | 322.77 | ± 1.35  |
| 970 °C                                                          | @ | 59.59163  | 0.00264 | 0.00418 | 58.356212  | 97.93 | 8.50  | 326.42 | ± 1.40  |
| 1000 °C                                                         | @ | 59.85925  | 0.00048 | 0.00369 | 58.767351  | 98.18 | 7.72  | 328.52 | ± 1.44  |
| 1030 °C                                                         | @ | 59.38999  | 0.00022 | 0.00312 | 58.467291  | 98.45 | 7.42  | 326.99 | ± 1.29  |
| 1060 °C                                                         | @ | 58.58592  | 0.00134 | 0.00177 | 58.062691  | 99.11 | 8.67  | 324.92 | ± 1.48  |
| 1090 °C                                                         |   | 58.01042  | 0.00089 | 0.00122 | 57.650667  | 99.38 | 7.25  | 322.80 | ± 1.34  |
| 1120 °C                                                         |   | 56.75512  | 0.05331 | 0.00238 | 56.059044  | 98.77 | 1.11  | 314.62 | ± 3.52  |
| 1200 °C                                                         |   | 50.89403  | 0.00839 | 0.00565 | 49.222415  | 96.72 | 0.72  | 279.06 | ± 8.61  |
| 1280 °C                                                         |   | 49.70336  | 0.03665 | 0.00750 | 47.490693  | 95.55 | 0.54  | 269.94 | ±11.76  |
| 1360 °C                                                         |   | 148.72942 | 0.76590 | 0.08213 | 124.324136 | 83.65 | 0.04  | 635.96 | ±179.36 |
| <b>Sample no. 10TZHD03 Muscovite J = 0.0042300 ± 0.0000106</b>  |   |           |         |         |            |       |       |        |         |
| 750 °C                                                          |   | 51.85745  | 0.00218 | 0.01950 | 46.094518  | 88.89 | 0.63  | 322.11 | ± 2.97  |
| 800 °C                                                          |   | 48.23514  | 0.00295 | 0.00656 | 46.295463  | 95.98 | 3.04  | 323.40 | ± 1.69  |
| 840 °C                                                          |   | 48.45423  | 0.00165 | 0.00325 | 47.492508  | 98.02 | 5.63  | 331.04 | ± 1.60  |
| 870 °C                                                          | @ | 48.82770  | 0.00080 | 0.00206 | 48.218120  | 98.75 | 14.31 | 335.66 | ± 1.49  |
| 890 °C                                                          | @ | 48.37102  | 0.00079 | 0.00101 | 48.071670  | 99.38 | 12.47 | 334.73 | ± 1.51  |
| 910 °C                                                          | @ | 48.38273  | 0.00074 | 0.00105 | 48.072630  | 99.36 | 9.45  | 334.73 | ± 1.79  |
| 930 °C                                                          | @ | 48.56529  | 0.00086 | 0.00121 | 48.206757  | 99.26 | 7.47  | 335.58 | ± 1.68  |
| 950 °C                                                          | @ | 48.64993  | 0.00035 | 0.00151 | 48.203039  | 99.08 | 3.94  | 335.56 | ± 1.46  |
| 980 °C                                                          | @ | 48.58185  | 0.00043 | 0.00147 | 48.146354  | 99.10 | 3.71  | 335.20 | ± 1.57  |
| 1030 °C                                                         | @ | 48.71511  | 0.00021 | 0.00132 | 48.325856  | 99.20 | 5.50  | 336.34 | ± 1.62  |
| 1080 °C                                                         | @ | 48.71690  | 0.00110 | 0.00108 | 48.398722  | 99.35 | 7.41  | 336.80 | ± 1.35  |
| 1110 °C                                                         | @ | 48.58756  | 0.00074 | 0.00079 | 48.354004  | 99.52 | 6.80  | 336.52 | ± 1.42  |
| 1140 °C                                                         |   | 48.72212  | 0.00079 | 0.00048 | 48.580730  | 99.71 | 9.00  | 337.96 | ± 1.45  |
| 1170 °C                                                         |   | 48.96838  | 0.00047 | 0.00032 | 48.874915  | 99.81 | 8.66  | 339.83 | ± 1.48  |
| 1200 °C                                                         |   | 49.34601  | 0.00067 | 0.00075 | 49.124286  | 99.55 | 1.39  | 341.41 | ± 2.51  |
| 1400 °C                                                         |   | 49.56763  | 0.00721 | 0.00403 | 48.377695  | 97.60 | 0.60  | 336.67 | ± 2.69  |
